# Supplementary material for: Past-year intimate partner violence perpetration among people with and without depression: an individual participant data (IPD) meta-mediation analysis
Source: Soc Psychiatry Psychiatr Epidemiol. 2021 Nov 29;58(12):1735–47. doi: 10.1007/s00127-021-02183-w (PMC10627935; doi:10.1007/s00127-021-02183-w)
Supplement: Supplementary file 3 — Supplementary file3 (PDF 377 KB) [file 127_2021_2183_MOESM3_ESM.pdf]

## Supplementary Information

### Article title:

Past year intimate partner violence perpetration among people with and without depression: an individual participant data (IPD) meta-mediation analysis.

### Journal name:

Social Psychiatry and Psychiatric Epidemiology.

### Author names:

Katherine Saunders, Sabine Landau, Louise M Howard, Helen L. Fisher, Louise Arseneault, Geraldine F H McLeod, Sian Oram

**Corresponding author:** Dr Sian Oram, King's College London, Health Service and Population Research Department, Institute of Psychiatry, Psychology & Neuroscience, London, United Kingdom; email: [sian.oram@kcl.ac.uk](mailto:sian.oram@kcl.ac.uk)

**Search strategy:** In stage 1, electronic searches were conducted of 7 bibliographic databases: [MEDLINE, EMBASE, PsycINFO, Web of Science, HMIC, BNID, and CINAHL]. Searches were conducted on 12/02/18 with no lower date limit. Search terms combined MeSH and keyword terms in three domains: intimate partner violence, perpetration, and mental disorder (see supplementary information), adapted from a previous systematic review [24]. Forward citation tracking (using Google Scholar and Web of Science) and reference list screening were used to identify other potentially relevant literature. Reference lists of relevant systematic reviews were searched to identify any other studies which potentially met the eligibility criteria. Five experts were contacted with a list of included studies for the aggregate systematic review and asked to identify any additional relevant studies or data for inclusion; one replied, identifying 13 studies, none of which were included in the final IPD meta-analyses. In stage 2, one academic referred us to an additional study. This study was screened, met inclusion criteria, and was included in the final IPD meta-analysis.

**Screening:** In stage 1, citations for the aggregate review were downloaded to Covidence© software on 12/02/18. Duplicates were removed. Titles and abstracts of the downloaded citations were assessed by KS for relevance to the current study based on the inclusion/exclusion criteria. A second reviewer independently assessed 10% of titles and abstracts (n=311), with initial agreement of 97%. Discrepancies were discussed and resolved. The full text of all citations deemed potentially relevant were obtained and assessed against inclusion/exclusion criteria for the aggregate review by KS. In stage 2, studies included in the aggregate review at the full-text stage were rescreened by KS against inclusion criteria for the IPD meta-analysis, which were more stringent. A second reviewer independently assessed 5% of randomly selected studies, with 100% agreement.

### Search terms

1. Domestic violence/
2. Family violence/
3. Partner abuse/
4. Partner violence/
5. Spouse abuse/
6. Marital violence OR Marital abuse/
7. Stalk\$/
8. Family conflict/
9. ((abus\$ OR batter\$ OR violen\$ OR beat\$) adj2 (perpetrat\$ OR domestic OR partner\$ OR family OR families OR spouse OR woman OR women OR men OR man OR female\$ OR male\$ OR wife OR wives OR husband\$ OR boyfriend\$ OR girlfriend\$ OR brother\$ OR sister\$ OR father\$ OR mother\$ OR son\$ OR daughter\$).mp.)
10. (domestic adj2 homicid\$).mp
11. 1 OR 2 OR 3 OR 4 OR 5 OR 6 OR 7 OR 8 OR 9 OR 10
12. Mental disorder/
13. Mental illness/
14. Mental health/
15. Mentally ill persons/
16. (Mental\$ adj2 (problem\$ OR difficult\$ OR disorder\$ OR ill\$ OR health).mp.)
17. Mental health services/
18. Community Mental Health Services/
19. ((mental OR psychiatr\$ OR psychologist\$) adj2 (inpatient\$ OR outpatient\$ OR hospital\$ OR clinic\$ OR service\$ OR ward\$

OR healthcare).mp)  
 20. Autis\$ OR ASD  
 21. Dementia OR Alzheimer OR cognitive impairment OR delirium  
 22. Attention deficit hyperactivity disorder OR ADHD  
 23. Schiz\$/  
 24. Psychosis/  
 25. Psychotic/  
 26. Bipolar/  
 27. Depress\$/  
 28. Mania OR manic  
 29. Neurosis OR psychoneurosis  
 30. Obsessive OR compulsive  
 31. Personality disorder/ OR anankastic personality disorder/ OR antisocial personality disorder/ OR avoidant personality disorder/ OR borderline personality disorder/ OR compulsive personality disorder/ OR dependent personality disorder/ OR histrionic personality disorder/ OR narcissistic personality disorder/ OR obsessive compulsive personality disorder/ OR paranoid personality disorder/ OR passive-aggressive personality disorder/ OR schizoid personality disorder/ OR schizotypal personality disorder/) OR ((anankastic OR asocial OR antisocial OR avoidant OR borderline OR dependent OR dissocial OR histrionic OR narcissistic OR obsessive OR compulsive OR paranoid OR passive-aggressive OR psychopath\$ OR sadist\$ OR sadomasochistic OR schizo\$ OR sociopath\$) adj person\$).tw. OR (personality AND disorder\$) OR psychopath\$.tw OR sociopath\$.tw  
 32. Eating disorder\$/ OR Anorexia Nervosa/ OR Binge-Eating Disorder/or Bulimia Nervosa/ OR ((anorexi\$ OR bulimi\$) AND nervosa) OR eating disorder\$ OR binge-eat\$ OR (bing\$ adj eat\$) OR (compulsive adj (eat\$ or vomit\$ or purg\$))  
 33. ((Delusional OR paranoi\$ OR mood OR neurotic OR stress OR reactive OR combat OR somatoform OR somatization OR somatisation OR anxiety OR phobic OR obsessive-compulsive OR adjustment OR dissociat\$) adj2 disorder\$))  
 34. 13 OR 14 OR 15 OR 16 OR 17 OR 18 OR 19 OR 20 OR 21 OR 22 OR 23 OR 24 OR 25 OR 26 OR 27 OR 28 OR 29 OR 30 OR 31 OR 32 OR 33 OR 34  
 35. 11 AND 34  
 36. Perpetrat\$/  
 37. 35 and 36

**Supplementary Table 1**

|                                           | Exposure                                           | Outcome                                                                                                                                                                                                                                                                                                                                                                                                                    | Mediators                                                                                                                                                                                                                                                                                                                                                                                    |                                                 |
|-------------------------------------------|----------------------------------------------------|----------------------------------------------------------------------------------------------------------------------------------------------------------------------------------------------------------------------------------------------------------------------------------------------------------------------------------------------------------------------------------------------------------------------------|----------------------------------------------------------------------------------------------------------------------------------------------------------------------------------------------------------------------------------------------------------------------------------------------------------------------------------------------------------------------------------------------|-------------------------------------------------|
| Dataset                                   | Depression                                         | Past year physical IPV perpetration                                                                                                                                                                                                                                                                                                                                                                                        | Any past year IPV victimisation                                                                                                                                                                                                                                                                                                                                                              | Alcohol misuse                                  |
| Christchurch Health and Development Study | DSM IV major depression diagnosis in the past year | 'grabbed or shook partner';<br>'threw or tried to throw your partner bodily';<br>'threw an object at partner';<br>'choked or strangled partner';<br>'kicked your partner';<br>'became abusive after using drugs or alcohol';<br>'punched or hit your partner with something';<br>'slammed partner into a wall';<br>'burned or scaled partner on purpose';<br>'beat partner up';<br>'threatened partner with knife or gun'; | cursed or swore at you';<br>shouted or yelled at you';<br>partner stomped off during disagreement';<br>deliberately said something to hurt you';<br>called you fat/ugly/unattractive';<br>destroyed something belonging to you';<br>accused you of being a lousy lover';<br>threatened to hit or throw something at you';<br>physically twisted your arm or hair';<br>pushed or shoved you'; | Alcohol use disorder diagnosis in the past year |

|      |                                                                                                                                                                                                                                                                                                                                                                                                                                                                                                                                                                                                               |                                                                                                                                                                                                                                                                                                                                                                                                                                                                                                                                                     |                                                                                                                                                                                                                                                                                                                                                                                                                                                                                                                                                                                                                                                                                               |                                                                                                                                                                                   |
|------|---------------------------------------------------------------------------------------------------------------------------------------------------------------------------------------------------------------------------------------------------------------------------------------------------------------------------------------------------------------------------------------------------------------------------------------------------------------------------------------------------------------------------------------------------------------------------------------------------------------|-----------------------------------------------------------------------------------------------------------------------------------------------------------------------------------------------------------------------------------------------------------------------------------------------------------------------------------------------------------------------------------------------------------------------------------------------------------------------------------------------------------------------------------------------------|-----------------------------------------------------------------------------------------------------------------------------------------------------------------------------------------------------------------------------------------------------------------------------------------------------------------------------------------------------------------------------------------------------------------------------------------------------------------------------------------------------------------------------------------------------------------------------------------------------------------------------------------------------------------------------------------------|-----------------------------------------------------------------------------------------------------------------------------------------------------------------------------------|
|      |                                                                                                                                                                                                                                                                                                                                                                                                                                                                                                                                                                                                               | <p>'used knife or gun on partner';<br/>         'threatened to hit or throw something at partner';<br/>         'physically twisted partners arm or hair';<br/>         'pushed or shoved partner';<br/>         'slapped partner';<br/> <b>Threshold – positive endorsement of any item</b></p>                                                                                                                                                                                                                                                    | <p>slapped you';<br/>         force sex on you';<br/>         used threats to make you have sex';<br/>         grabbed or shook you';<br/>         threw or tried to throw you bodily';<br/>         threw an object at you';<br/>         choked or strangled you';<br/>         kicked you';<br/>         your partner became abusive after using drugs or alcohol';<br/>         punched or hit you with something';<br/>         slammed you into a wall';<br/>         burned or scaled you on purpose';<br/>         beat you up';<br/>         threatened you with knife or gun';<br/>         used knife or gun on you';<br/> <b>Threshold – positive endorsement of any item</b></p> |                                                                                                                                                                                   |
| NSFH | <p>On how many days during the past week did the participant:<br/>         Feel bothered by things that usually don't bother you?<br/>         Not feel like eating; your appetite was poor?<br/>         Feel that you could not shake off the blues even with help from your family or friends?<br/>         Have trouble keeping your mind on what you were doing?<br/>         Feel depressed?<br/>         Feel that everything you did was an effort?<br/>         Feel fearful?<br/>         Sleep restlessly?<br/>         Talk less than usual?<br/>         Feel lonely?<br/>         Feel sad?</p> | <p>Asked of those cohabiting:<br/>         During the past year, how many fights with your partner resulted in YOU hitting, shoving, or throwing things at him/her?<br/>         Has your PARTNER been cut, bruised, or seriously injured in a fight with you?</p> <p>Asked of married participants:<br/>         During the past year, how many fights with your husband/wife resulted in YOU hitting, shoving, or throwing things at him/her?<br/>         Has your HUSBAND/WIFE been cut, bruised, or seriously injured in a fight with you?</p> | <p>Asked of those cohabiting:<br/>         During the past year, how many fights with your partner resulted in HIM/HER hitting, shoving, or throwing things at you?<br/>         Have YOU been cut, bruised, or seriously injured in a fight with your partner?</p> <p>Asked of married participants:<br/>         During the past year, how many fights with your husband/wife resulted in HIM/HER hitting, shoving, or throwing things at you?<br/>         Have YOU been cut, bruised, or seriously injured in a fight with your husband/wife?<br/> <b>Threshold – positive endorsement of any item</b></p>                                                                                | <p>Who living here has a problem of drinking too much alcohol?<br/> <b>Threshold – if participant indicated they themselves had a problem with drinking too much alcohol.</b></p> |

|            |                                                                                                                                                                                                                                                                                                                                                                                                                                                                                                                                                                                                                                                                                                                                                                                                                   |                                                                                                                                                                                                                                                                                           |                                                                                                                                                                                                                                                                                                                                                                                                                                                                            |                                                                                                                                                                                                                                                                                                                                                                                                                                                                                                                                  |
|------------|-------------------------------------------------------------------------------------------------------------------------------------------------------------------------------------------------------------------------------------------------------------------------------------------------------------------------------------------------------------------------------------------------------------------------------------------------------------------------------------------------------------------------------------------------------------------------------------------------------------------------------------------------------------------------------------------------------------------------------------------------------------------------------------------------------------------|-------------------------------------------------------------------------------------------------------------------------------------------------------------------------------------------------------------------------------------------------------------------------------------------|----------------------------------------------------------------------------------------------------------------------------------------------------------------------------------------------------------------------------------------------------------------------------------------------------------------------------------------------------------------------------------------------------------------------------------------------------------------------------|----------------------------------------------------------------------------------------------------------------------------------------------------------------------------------------------------------------------------------------------------------------------------------------------------------------------------------------------------------------------------------------------------------------------------------------------------------------------------------------------------------------------------------|
|            | <p>Feel you could not get going?<br/> <b>Threshold - Score of 12+</b></p>                                                                                                                                                                                                                                                                                                                                                                                                                                                                                                                                                                                                                                                                                                                                         | <p><b>Threshold – positive endorsement of any item</b></p>                                                                                                                                                                                                                                |                                                                                                                                                                                                                                                                                                                                                                                                                                                                            |                                                                                                                                                                                                                                                                                                                                                                                                                                                                                                                                  |
| Add Health | <p>You were bothered by things that usually don't bother you.<br/> (During the past seven days:) You could not shake off the blues, even with help from your family and your friends.<br/> (During the past seven days:) You felt you were just as good as other people.<br/> (During the past seven days:) You had trouble keeping your mind on what you were doing.<br/> (During the past seven days:) You felt depressed.<br/> (During the past seven days:) You felt that you were too tired to do things.<br/> (During the past seven days:) You felt happy.<br/> (During the past seven days:) You enjoyed life.<br/> (During the past seven days:) You felt sad.<br/> (During the past seven days:) You felt that people disliked you, during the past seven days.<br/> <b>Threshold – Score of 8+</b></p> | <p>How often (have/did) you threatened {partner} with violence, pushed or shoved (him/her), or thrown something at (him/her) that could hurt?<br/> How often (have/did) you (slapped/slap), hit, or (kicked/kick) {partner}?<br/> <b>Threshold – positive endorsement of any item</b></p> | <p>How often (has/did) {initials} (threatened/threaten) you with violence, (pushed/push) or (shoved/shove) you, or (thrown/throw) something at you that could hurt?<br/> H4RD19 - How often (has/did) {initials} (slapped/slap), hit or (kicked/kick) you?<br/> H4RD21 - How often (has/did) {initials} (insisted/insist) on or (made/make) you have sexual relations with (him/her) when you didn't want to?<br/> <b>Threshold – positive endorsement of any item</b></p> | <p>During the past 30 days, on how many days did you drink? Think of all the times you have had a drink during the past 30 days. How many drinks did you usually have each time? A 'drink' is a glass of wine, a can or bottle of beer, a wine cooler, a shot glass of liquor, or a mixed drink. (four or five drinks corresponds with a 'binge')<br/><br/> <b>Threshold – captured individuals who reported drinking 2 days per week or more (on average) in the past month AND usually drank 4 or more drinks per day.</b></p> |

|           |                                                                                       |                                                                                                                                                                                                                                                                                                                                                                                                                                                                                                                                                                                                                                                                                                        |                                                                                                                                                                                                                                                                                                                                                                                                                                                                                                                                                                                                                                                                                          |                                             |
|-----------|---------------------------------------------------------------------------------------|--------------------------------------------------------------------------------------------------------------------------------------------------------------------------------------------------------------------------------------------------------------------------------------------------------------------------------------------------------------------------------------------------------------------------------------------------------------------------------------------------------------------------------------------------------------------------------------------------------------------------------------------------------------------------------------------------------|------------------------------------------------------------------------------------------------------------------------------------------------------------------------------------------------------------------------------------------------------------------------------------------------------------------------------------------------------------------------------------------------------------------------------------------------------------------------------------------------------------------------------------------------------------------------------------------------------------------------------------------------------------------------------------------|---------------------------------------------|
| E-Risk    | DIS used to measure past year depression among mothers                                | <p>In the past year: Have you pushed, grabbed, or shoved a partner?<br/>Have you slapped a partner?<br/>Have you shaken a partner?<br/>Have you thrown an object at a partner that could hurt them?<br/>Have you kicked, bitten, or hit a partner with a fist?<br/>Have you hit or tried to hit a partner with something?<br/>Have you physically twisted a partner's arm?<br/>Have you thrown or tried to throw a partner bodily?<br/>Have you beaten a partner up (multiple blows)?<br/>Have you choked or strangled a partner?<br/>Have you threatened a partner with a knife or gun?<br/>Have you used a knife or gun on a partner?</p> <p><b>Threshold – positive endorsement of any item</b></p> | <p>In the past year: Has a partner pushed, grabbed, or shoved you?<br/>Has a partner slapped you?<br/>Has a partner shaken you?<br/>Has a partner thrown an object at you that could hurt you?<br/>Has a partner kicked, bitten, or hit you with a fist?<br/>Has a partner hit or tried to hit you with something?<br/>Has a partner physically twisted your arm?<br/>Has a partner thrown or tried to throw you bodily?<br/>Has a partner beaten you up (multiple blows)?<br/>Has a partner choked or strangled you?<br/>Has a partner threatened you with a knife or gun?<br/>Has a partner used a knife or gun on you?</p> <p><b>Threshold – positive endorsement of any item</b></p> | Current substance misuse diagnosis          |
| 2014 APMS | CISR used to categorise mild, moderate and severe depression (ICD-10 diagnosis f32.2) | <p>Pushed, held, pinned down, slapped a partner/ex in the past year.<br/>Kicked, bit, hit, or thrown something at a partner/ex- partner that hurt them in past year</p> <p><b>Threshold – positive endorsement of any item</b></p>                                                                                                                                                                                                                                                                                                                                                                                                                                                                     | <p>Pushed, held, pinned down, slapped by a partner/ex in the past year.<br/>Kicked, bit, hit, or had something thrown at you that hurt in past year</p> <p><b>Threshold – positive endorsement of any item</b></p>                                                                                                                                                                                                                                                                                                                                                                                                                                                                       | <b>Threshold – score of 8+ on the audit</b> |

## PRISMA-IPD Checklist of items to include when reporting a systematic review and meta-analysis of individual participant data (IPD)

| PRISMA-IPD<br>Section/topic | Item<br>No | Checklist item                                                                                                                                                                                                                                                                                                                                                                                                                                                                                                          | Reported<br>on page |
|-----------------------------|------------|-------------------------------------------------------------------------------------------------------------------------------------------------------------------------------------------------------------------------------------------------------------------------------------------------------------------------------------------------------------------------------------------------------------------------------------------------------------------------------------------------------------------------|---------------------|
| Title                       |            |                                                                                                                                                                                                                                                                                                                                                                                                                                                                                                                         |                     |
| Title                       | 1          | Identify the report as a systematic review and meta-analysis of individual participant data.                                                                                                                                                                                                                                                                                                                                                                                                                            | 1                   |
| Abstract                    |            |                                                                                                                                                                                                                                                                                                                                                                                                                                                                                                                         |                     |
| Structured<br>summary       | 2          | Provide a structured summary including as applicable:                                                                                                                                                                                                                                                                                                                                                                                                                                                                   | 2                   |
|                             |            | <b>Background:</b> state research question and main objectives, with information on participants, interventions, comparators and outcomes.                                                                                                                                                                                                                                                                                                                                                                              |                     |
|                             |            | <b>Methods:</b> report eligibility criteria; data sources including dates of last bibliographic search or elicitation, noting that IPD were sought; methods of assessing risk of bias.                                                                                                                                                                                                                                                                                                                                  |                     |
|                             |            | <b>Results:</b> provide number and type of studies and participants identified and number (%) obtained; summary effect estimates for main outcomes (benefits and harms) with confidence intervals and measures of statistical heterogeneity. Describe the direction and size of summary effects in terms meaningful to those who would put findings into practice.                                                                                                                                                      |                     |
|                             |            | <b>Discussion:</b> state main strengths and limitations of the evidence, general interpretation of the results and any important implications.                                                                                                                                                                                                                                                                                                                                                                          |                     |
|                             |            | <b>Other:</b> report primary funding source, registration number and registry name for the systematic review and IPD meta-analysis.                                                                                                                                                                                                                                                                                                                                                                                     |                     |
| Introduction                |            |                                                                                                                                                                                                                                                                                                                                                                                                                                                                                                                         |                     |
| Rationale                   | 3          | Describe the rationale for the review in the context of what is already known.                                                                                                                                                                                                                                                                                                                                                                                                                                          | 3-4                 |
| Objectives                  | 4          | Provide an explicit statement of the questions being addressed with reference, as applicable, to participants, interventions, comparisons, outcomes and study design (PICOS). Include any hypotheses that relate to particular types of participant-level subgroups.                                                                                                                                                                                                                                                    | 4                   |
| Methods                     |            |                                                                                                                                                                                                                                                                                                                                                                                                                                                                                                                         |                     |
| Protocol and registration   | 5          | Indicate if a protocol exists and where it can be accessed. If available, provide registration information including registration number and registry name. Provide publication details, if applicable.                                                                                                                                                                                                                                                                                                                 | 4                   |
| Eligibility criteria        | 6          | Specify inclusion and exclusion criteria including those relating to participants, interventions, comparisons, outcomes, study design and characteristics (e.g. years when conducted, required minimum follow-up). Note whether these were applied at the study or individual level i.e. whether eligible participants were included (and ineligible participants excluded) from a study that included a wider population than specified by the review inclusion criteria. The rationale for criteria should be stated. | 4                   |
| Identifying studies -       | 7          | Describe all methods of identifying published and unpublished studies including, as applicable: which bibliographic databases were searched with dates of coverage; details of any hand searching including of conference proceedings; use of study registers                                                                                                                                                                                                                                                           | 4-5                 |

|                                                |    |                                                                                                                                                                                                                                                                                                                                                                                                                                                                                                                                                                                                                                                                                                                                                                                                                                                                                                                                                                                                                                   |                     |
|------------------------------------------------|----|-----------------------------------------------------------------------------------------------------------------------------------------------------------------------------------------------------------------------------------------------------------------------------------------------------------------------------------------------------------------------------------------------------------------------------------------------------------------------------------------------------------------------------------------------------------------------------------------------------------------------------------------------------------------------------------------------------------------------------------------------------------------------------------------------------------------------------------------------------------------------------------------------------------------------------------------------------------------------------------------------------------------------------------|---------------------|
| information sources                            |    | and agency or company databases; contact with the original research team and experts in the field; open adverts and surveys. Give the date of last search or elicitation.                                                                                                                                                                                                                                                                                                                                                                                                                                                                                                                                                                                                                                                                                                                                                                                                                                                         |                     |
| Identifying studies - search                   | 8  | Present the full electronic search strategy for at least one database, including any limits used, such that it could be repeated.                                                                                                                                                                                                                                                                                                                                                                                                                                                                                                                                                                                                                                                                                                                                                                                                                                                                                                 | Supp mat            |
| Study selection processes                      | 9  | State the process for determining which studies were eligible for inclusion.                                                                                                                                                                                                                                                                                                                                                                                                                                                                                                                                                                                                                                                                                                                                                                                                                                                                                                                                                      | 4-5                 |
| Data collection processes                      | 10 | Describe how IPD were requested, collected and managed, including any processes for querying and confirming data with investigators. If IPD were not sought from any eligible study, the reason for this should be stated (for each such study).                                                                                                                                                                                                                                                                                                                                                                                                                                                                                                                                                                                                                                                                                                                                                                                  | 4-5 and<br>Figure 1 |
|                                                |    | If applicable, describe how any studies for which IPD were not available were dealt with. This should include whether, how and what aggregate data were sought or extracted from study reports and publications (such as extracting data independently in duplicate) and any processes for obtaining and confirming these data with investigators.                                                                                                                                                                                                                                                                                                                                                                                                                                                                                                                                                                                                                                                                                |                     |
| Data items                                     | 11 | Describe how the information and variables to be collected were chosen. List and define all study level and participant level data that were sought, including baseline and follow-up information. If applicable, describe methods of standardising or translating variables within the IPD datasets to ensure common scales or measurements across studies.                                                                                                                                                                                                                                                                                                                                                                                                                                                                                                                                                                                                                                                                      | 5-6 and<br>supp mat |
| IPD integrity                                  | A1 | Describe what aspects of IPD were subject to data checking (such as sequence generation, data consistency and completeness, baseline imbalance) and how this was done.                                                                                                                                                                                                                                                                                                                                                                                                                                                                                                                                                                                                                                                                                                                                                                                                                                                            | 5-6 and<br>supp mat |
| Risk of bias assessment in individual studies. | 12 | Describe methods used to assess risk of bias in the individual studies and whether this was applied separately for each outcome. If applicable, describe how findings of IPD checking were used to inform the assessment. Report if and how risk of bias assessment was used in any data synthesis.                                                                                                                                                                                                                                                                                                                                                                                                                                                                                                                                                                                                                                                                                                                               | N/A                 |
| Specification of outcomes and effect measures  | 13 | State all treatment comparisons of interests. State all outcomes addressed and define them in detail. State whether they were pre-specified for the review and, if applicable, whether they were primary/main or secondary/additional outcomes. Give the principal measures of effect (such as risk ratio, hazard ratio, difference in means) used for each outcome.                                                                                                                                                                                                                                                                                                                                                                                                                                                                                                                                                                                                                                                              | 4-5                 |
| Synthesis methods                              | 14 | Describe the meta-analysis methods used to synthesise IPD. Specify any statistical methods and models used. Issues should include (but are not restricted to): <ul style="list-style-type: none"> <li>• Use of a one-stage or two-stage approach.</li> <li>• How effect estimates were generated separately within each study and combined across studies (where applicable).</li> <li>• Specification of one-stage models (where applicable) including how clustering of patients within studies was accounted for.</li> <li>• Use of fixed or random effects models and any other model assumptions, such as proportional hazards.</li> <li>• How (summary) survival curves were generated (where applicable).</li> <li>• Methods for quantifying statistical heterogeneity (such as <math>I^2</math> and <math>\tau^2</math>).</li> <li>• How studies providing IPD and not providing IPD were analysed together (where applicable).</li> <li>• How missing data within the IPD were dealt with (where applicable).</li> </ul> | 5-7                 |

|                                     |    |                                                                                                                                                                                                                                                                                                                                                                                                                                                                   |                                       |
|-------------------------------------|----|-------------------------------------------------------------------------------------------------------------------------------------------------------------------------------------------------------------------------------------------------------------------------------------------------------------------------------------------------------------------------------------------------------------------------------------------------------------------|---------------------------------------|
| Exploration of variation in effects | A2 | If applicable, describe any methods used to explore variation in effects by study or participant level characteristics (such as estimation of interactions between effect and covariates). State all participant-level characteristics that were analysed as potential effect modifiers, and whether these were pre-specified.                                                                                                                                    | 4-7                                   |
| Risk of bias across studies         | 15 | Specify any assessment of risk of bias relating to the accumulated body of evidence, including any pertaining to not obtaining IPD for particular studies, outcomes or other variables.                                                                                                                                                                                                                                                                           | Table 2                               |
| Additional analyses                 | 16 | Describe methods of any additional analyses, including sensitivity analyses. State which of these were pre-specified.                                                                                                                                                                                                                                                                                                                                             | Supp mat                              |
| <b>Results</b>                      |    |                                                                                                                                                                                                                                                                                                                                                                                                                                                                   |                                       |
| Study selection and IPD obtained    | 17 | Give numbers of studies screened, assessed for eligibility, and included in the systematic review with reasons for exclusions at each stage. Indicate the number of studies and participants for which IPD were sought and for which IPD were obtained. For those studies where IPD were not available, give the numbers of studies and participants for which aggregate data were available. Report reasons for non-availability of IPD. Include a flow diagram. | Figure 1                              |
| Study characteristics               | 18 | For each study, present information on key study and participant characteristics (such as description of interventions, numbers of participants, demographic data, unavailability of outcomes, funding source, and if applicable duration of follow-up). Provide (main) citations for each study. Where applicable, also report similar study characteristics for any studies not providing IPD.                                                                  | Table 1 and Table 2                   |
| IPD integrity                       | A3 | Report any important issues identified in checking IPD or state that there were none.                                                                                                                                                                                                                                                                                                                                                                             | 4-7                                   |
| Risk of bias within studies         | 19 | Present data on risk of bias assessments. If applicable, describe whether data checking led to the up-weighting or down-weighting of these assessments. Consider how any potential bias impacts on the robustness of meta-analysis conclusions.                                                                                                                                                                                                                   | None                                  |
| Results of individual studies       | 20 | For each comparison and for each main outcome (benefit or harm), for each individual study report the number of eligible participants for which data were obtained and show simple summary data for each intervention group (including, where applicable, the number of events), effect estimates and confidence intervals. These may be tabulated or included on a forest plot.                                                                                  | Table 3 and supp mat                  |
| Results of syntheses                | 21 | Present summary effects for each meta-analysis undertaken, including confidence intervals and measures of statistical heterogeneity. State whether the analysis was pre-specified, and report the numbers of studies and participants and, where applicable, the number of events on which it is based.                                                                                                                                                           | Page 7-8, Figure 2, Table 3, Supp Mat |
|                                     |    | When exploring variation in effects due to patient or study characteristics, present summary interaction estimates for each characteristic examined, including confidence intervals and measures of statistical heterogeneity. State whether the analysis was pre-specified. State whether any interaction is consistent across trials.                                                                                                                           |                                       |
|                                     |    | Provide a description of the direction and size of effect in terms meaningful to those who would put findings into practice.                                                                                                                                                                                                                                                                                                                                      |                                       |
| Risk of bias across studies         | 22 | Present results of any assessment of risk of bias relating to the accumulated body of evidence, including any pertaining to the availability and representativeness of available studies, outcomes or other variables.                                                                                                                                                                                                                                            | None                                  |

|                           |    |                                                                                                                                                                                                                                                                                                                                       |          |
|---------------------------|----|---------------------------------------------------------------------------------------------------------------------------------------------------------------------------------------------------------------------------------------------------------------------------------------------------------------------------------------|----------|
| Additional analyses       | 23 | Give results of any additional analyses (e.g. sensitivity analyses). If applicable, this should also include any analyses that incorporate aggregate data for studies that do not have IPD. If applicable, summarise the main meta-analysis results following the inclusion or exclusion of studies for which IPD were not available. | Supp mat |
| <b>Discussion</b>         |    |                                                                                                                                                                                                                                                                                                                                       |          |
| Summary of evidence       | 24 | Summarise the main findings, including the strength of evidence for each main outcome.                                                                                                                                                                                                                                                | 8        |
| Strengths and limitations | 25 | Discuss any important strengths and limitations of the evidence including the benefits of access to IPD and any limitations arising from IPD that were not available.                                                                                                                                                                 | 9-10     |
| Conclusions               | 26 | Provide a general interpretation of the findings in the context of other evidence.                                                                                                                                                                                                                                                    | 8-9      |
| Implications              | A4 | Consider relevance to key groups (such as policy makers, service providers and service users). Consider implications for future research.                                                                                                                                                                                             | 10-11    |
| <b>Funding</b>            |    |                                                                                                                                                                                                                                                                                                                                       |          |
| Funding                   | 27 | Describe sources of funding and other support (such as supply of IPD), and the role in the systematic review of those providing such support.                                                                                                                                                                                         | 11-12    |

A1 – A3 denote new items that are additional to standard PRISMA items. A4 has been created as a result of re-arranging content of the standard PRISMA statement to suit the way that systematic review IPD meta-analyses are reported.

© Reproduced with permission of the PRISMA IPD Group, which encourages sharing and reuse for non-commercial purposes

## Analysis Code

### 1. E-Risk code:

```
keep if a10who==1
*Variable generation*
/* Exposure variable:
mdep10 - past year depression in mothers, measured using DIS - already binary
> DepressionPY
*/
gen DepressionPY = mdep10
/*Outcome variable:*/
*Physical IPV perp
gen PhysicalIPVperpPY = vi2mm10
recode PhysicalIPVperpPY 0=0 1/max=1
label variable PhysicalIPVperpPY "Mother's past year perpetration of physical IPV"
label define PhysicalIPVperpPY 1 "Yes" 0 "No"
label values PhysicalIPVperpPY PhysicalIPVperpPY
tab PhysicalIPVperpPY vi2mm10

*Severe IPV perp
gen sev1=rp15m10
recode sev1 0=0 1/2=1 3/max=2 -8=3
gen sev2=rp17m10
recode sev2 0=0 1/2=1 3/max=2 -8=3
gen sev3=rp19m10
recode sev3 0=0 1/2=1 3/max=2 -8=3
gen sev4=rp21m10
recode sev4 0=0 1/2=1 3/max=2 -8=3
gen sev5=rp23m10
recode sev5 0=0 1/2=1 3/max=2 -8=3
gen sev6=rp25m10
recode sev6 0=0 1/2=1 3/max=2 -8=3
gen sev7=rp27m10
```

```
recode sev7 0=0 1/2=1 3/max=2 -8=3
```

```
gen sev8=rp29m10
```

```
recode sev8 0=0 1/2=1 3/max=2 -8=3
```

```
gen SevPhysIPVPerp=.
```

```
replace SevPhysIPVPerp=1 if sev1==1 | sev2==1 | sev3==1 | sev4==1 | sev5==1 | sev6==1 | sev7==1 | sev8==1
```

```
replace SevPhysIPVPerp=0 if sev1==0 & sev2==0 & sev3==0 & sev4==0 & sev5==0 & sev6==0 & sev7==0 & sev8==0
```

```
label variable SevPhysIPVPerp "Perpetration of severe physical IPV in the past year"
```

```
label define SevPhysIPVPerp 0 "No" 1 "Yes"
```

```
label values SevPhysIPVPerp SevPhysIPVPerp
```

```
tab SevPhysIPVPerp
```

```
tab SevPhysIPVPerp sev1
```

```
tab SevPhysIPVPerp sev2
```

```
tab SevPhysIPVPerp sev3
```

```
tab SevPhysIPVPerp sev4
```

```
tab SevPhysIPVPerp sev5
```

```
tab SevPhysIPVPerp sev6
```

```
tab SevPhysIPVPerp sev7
```

```
tab SevPhysIPVPerp sev8
```

```
/*Mediator variables:*/
```

```
*alcohol misuse
```

```
gen SubMisuse = alcdxmm10
```

```
*IPV victimisation in the past year
```

```
gen IPVvictPY = viogpm10
```

```
recode IPVvictPY 0=0 1/max=1
```

```
label variable IPVvictPY "Mother's past year physical IPV victimisation"
```

```
label define IPVvictPY 1 "Yes" 0 "No"
```

```
label values IPVvictPY IPVvictPY
```

```
tab IPVvictPY viogpm10
```

```
*severe IPV victimisation in the past year
```

```

gen sev1v=rp16m10
recode sev1v 0=0 1/2=1 3/max=2 -8=3
gen sev2v=rp18m10
recode sev2v 0=0 1/2=1 3/max=2 -8=3
gen sev3v=rp20m10
recode sev3v 0=0 1/2=1 3/max=2 -8=3
gen sev4v=rp22m10
recode sev4v 0=0 1/2=1 3/max=2 -8=3
gen sev5v=rp24m10
recode sev5v 0=0 1/2=1 3/max=2 -8=3
gen sev6v=rp26m10
recode sev6v 0=0 1/2=1 3/max=2 -8=3
gen sev7v=rp28m10
recode sev7v 0=0 1/2=1 3/max=2 -8=3
gen sev8v=rp30m10
recode sev8v 0=0 1/2=1 3/max=2 -8=3

gen SevPhysIPVvict=.

replace SevPhysIPVvict=1 if sev1v==1 | sev2v==1 | sev3v==1 | sev4v==1 | sev5v==1 | sev6v==1 | sev7v==1 |
sev8v==1

replace SevPhysIPVvict=0 if sev1v==0 & sev2v==0 & sev3v==0 & sev4v==0 & sev5v==0 & sev6v==0 & sev7v==0
& sev8v==0

label variable SevPhysIPVvict "Severe physical IPV victimisation in the past year"

label define SevPhysIPVvict 0 "No" 1 "Yes"

label values SevPhysIPVvict SevPhysIPVvict

tab SevPhysIPVvict

tab SevPhysIPVvict sev1v
tab SevPhysIPVvict sev2v
tab SevPhysIPVvict sev3v
tab SevPhysIPVvict sev4v
tab SevPhysIPVvict sev5v
tab SevPhysIPVvict sev6v
tab SevPhysIPVvict sev7v
tab SevPhysIPVvict sev8v

```

```

/*Variables for adjustment + descriptive analyses:*/

*education

gen education=hiedm5

replace education=hiedm7 if hiedm7>hiedm5

replace education=hiedm5 if hiedm7==.

recode education -9=. -1=. 0=0 1/3=1 4/7=2

label define education 0 "None" 1 "High school qualifications" 2 "Degree/equiv or higher"

label values education education

label variable education "Highest education qualification at child age 7"

tab education hiedgm57

tab education, gen (educationdummy)


*number of children

gen childrenbinary=KidsinFamily10

recode childrenbinary 0=0 1/max=1

label variable childrenbinary "Has children in family Y/N"

label define childrenbinary 0 "No" 1 "Yes"

label values childrenbinary childrenbinary

tab childrenbinary KidsinFamily10


*age

gen age = mage10


*relationship status

rename rp31m10 MumPartneredLast5y

tab MumPartneredLast5y

gen relationshipbinary=MumPartneredLast5y

label variable relationshipbinary "Has mum had a partner in past 5 years?"

label define relationshipbinary 0 "No" 1 "Yes"

label values relationshipbinary relationshipbinary

tab relationshipbinary


*income

tab ed56m5

```

```

gen income=ed56m5

recode income 99=. 0=1999.5 1=4999.5 2=6999.5 3=8999.5 4=10999.5 5=13499.5 6=16499.5 7=18999.5
8=21499.5 9=24499.5 10=27499.5 11=27499.5 12=33499.5 13=36499.5 14=39499.5 15=42499.5

label variable income "Approximate income"

*ANALYSIS
** descriptive
summarize mage10, detail
* descriptive
tab DepressionPY
proportion DepressionPY
* descriptive
tab PhysicalIPVperpPY
proportion PhysicalIPVperpPY
* descriptive
tab SevPhysIPVPerp
proportion SevPhysIPVPerp
* descriptive
tab2 SevPhysIPVPerp DepressionPY
proportion SevPhysIPVPerp if DepressionPY==1
proportion SevPhysIPVPerp if DepressionPY==0
* descriptive
tab2 PhysicalIPVperpPY DepressionPY
proportion PhysicalIPVperpPY if DepressionPY==1
proportion PhysicalIPVperpPY if DepressionPY==0

/* mediation analyses */
*** physical perpetration outcome analyses ***
*alcohol mediation
gen int_dep_substance = DepressionPY*SubMisuse
medeff (logit SubMisuse DepressionPY age income educationdummy1 educationdummy2 KidsinFamily10)
(logit PhysicalIPVperpPY DepressionPY SubMisuse int_dep_substance age income educationdummy1
educationdummy2 KidsinFamily10), mediate (SubMisuse) treat(DepressionPY) sims(1000) seed(1) level(95)
interact(int_dep_substance)

```

```

/*IPV vict mediation */

gen int_dep_vict = DepressionPY*IPVvictPY

medeff (logit IPVvictPY DepressionPY age income educationdummy1 educationdummy2 KidsinFamily10) (logit
PhysicalIPVperpPY DepressionPY IPVvictPY int_dep_vict age income educationdummy1 educationdummy2
KidsinFamily10), mediate (IPVvictPY) treat(DepressionPY) sims(1000) seed(1) level(95) interact(int_dep_vict)


/*severe IPV vict mediation*/

gen int_dep_Sevvict = DepressionPY*SevPhysIPVvict

medeff (logit SevPhysIPVvict DepressionPY age income educationdummy1 educationdummy2 KidsinFamily10)
(logit PhysicalIPVperpPY DepressionPY SevPhysIPVvict int_dep_Sevvict age income educationdummy1
educationdummy2 KidsinFamily10), mediate (SevPhysIPVvict) treat(DepressionPY) sims(1000) seed(1) level(95)
interact(int_dep_Sevvict)


*** severe physical perpetration outcome analyses ***


/*IPV vict mediation */

medeff (logit IPVvictPY DepressionPY age income educationdummy1 educationdummy2 KidsinFamily10) (logit
SevPhysIPVperpPY DepressionPY IPVvictPY int_dep_vict age income educationdummy1 educationdummy2
KidsinFamily10), mediate (IPVvictPY) treat(DepressionPY) sims(1000) seed(1) level(95) interact(int_dep_vict)


/*severe IPV vict mediation */

medeff (logit SevPhysIPVvict DepressionPY age income educationdummy1 educationdummy2 KidsinFamily10)
(logit SevPhysIPVperpPY DepressionPY SevPhysIPVvict int_dep_Sevvict age income educationdummy1
educationdummy2 KidsinFamily10), mediate (SevPhysIPVvict) treat(DepressionPY) sims(1000) seed(1) level(95)
interact(int_dep_Sevvict)

```

## 2. CHDS code

```

/*Exposure variables:*/

rename d30mdy majordepPY

label variable majordepPY "Major depression in the past year"

label define majordepPY 0 "No" 1 "Yes"

label values majordepPY majordepPY


/*Outcome variables:*/

gen perp1=z1531

recode perp1 0=0 1/7=1 8/max=2

gen perp2=z1532

```

```

recode perp2 0=0 1/7=1 8/max=2
gen perp3=z1533
recode perp3 0=0 1/7=1 8/max=2
gen perp4=z1534
recode perp4 0=0 1/7=1 8/max=2
gen perp5=z1535
recode perp5 0=0 1/7=1 8/max=2
gen perp6=z1536
recode perp6 0=0 1/7=1 8/max=2
gen perp7=z1537
recode perp7 0=0 1/7=1 8/max=2
gen perp8=z1538
recode perp8 0=0 1/7=1 8/max=2
gen perp9=z1539
recode perp9 0=0 1/7=1 8/max=2
gen perp10=z1540
recode perp10 0=0 1/7=1 8/max=2
gen perp11=z1541
recode perp11 0=0 1/7=1 8/max=2
gen perp12=z1542
recode perp12 0=0 1/7=1 8/max=2
gen perp13=z1526
recode perp13 0=0 1/7=1 8/max=2
gen perp14=z1527
recode perp14 0=0 1/7=1 8/max=2
gen perp15=z1528
recode perp15 0=0 1/7=1 8/max=2
gen PhysicalIPVperpPY =.
replace PhysicalIPVperpPY = 1 if perp1 == 1 | perp2 == 1 | perp3 == 1 | perp4 == 1 | perp5 == 1 | perp6 == 1 |
perp7 == 1 | perp8 == 1 | perp9 == 1 | perp10 == 1 | perp11 == 1 | perp12 == 1 | perp13 == 1 | perp14 == 1 |
perp15 == 1
replace PhysicalIPVperpPY = 0 if perp1 == 0 & perp2 == 0 & perp3 == 0 & perp4 == 0 & perp5 == 0 & perp6 == 0
& perp7 == 0 & perp8 == 0 & perp9 == 0 & perp10 == 0 & perp11 == 0 & perp12 == 0 & perp13 == 0 & perp14
== 0 & perp15 == 0
label variable PhysicalIPVperpPY "Perpetration of any physical IPV in the past year"
label define PhysicalIPVperpPY 0 "No" 1 "Yes"

```

label values PhysicalIPVperpPY PhysicalIPVperpPY

tab PhysicalIPVperpPY, missing

tab PhysicalIPVperpPY z1531, missing

tab PhysicalIPVperpPY z1532, missing

tab PhysicalIPVperpPY z1533, missing

tab PhysicalIPVperpPY z1534, missing

tab PhysicalIPVperpPY z1535, missing

tab PhysicalIPVperpPY z1536, missing

tab PhysicalIPVperpPY z1537, missing

tab PhysicalIPVperpPY z1538, missing

tab PhysicalIPVperpPY z1539, missing

tab PhysicalIPVperpPY z1540, missing

tab PhysicalIPVperpPY z1541, missing

tab PhysicalIPVperpPY z1542, missing

tab PhysicalIPVperpPY z1526, missing

tab PhysicalIPVperpPY z1527, missing

tab PhysicalIPVperpPY z1528, missing

/\* Severe physical IPV perp PY\*/

gen SevPhysIPVPerp = .

replace SevPhysIPVPerp = 1 if perp2==1 | perp4 == 1 | perp5 == 1 | perp7 == 1 | perp8 == 1 | perp9 == 1 |  
perp10==1 | perp11 == 1 | perp12 == 1

replace SevPhysIPVPerp = 0 if perp2==0 & perp4 == 0 & perp5 == 0 & perp7 == 0 & perp8 == 0 & perp9 == 0 &  
perp10==0 & perp11 == 0 & perp12 == 0

label variable SevPhysIPVPerp "Perpetration of severe physical IPV in the past year"

label define SevPhysIPVPerp 0 "No" 1 "Yes"

label values SevPhysIPVPerp SevPhysIPVPerp

tab SevPhysIPVPerp

tab SevPhysIPVPerp z1532

tab SevPhysIPVPerp z1534

tab SevPhysIPVPerp z1535

tab SevPhysIPVPerp z1537

tab SevPhysIPVPerp z1538

tab SevPhysIPVPerp z1539

tab SevPhysIPVPerp z1540

tab SevPhysIPVPerp z1541

tab SevPhysIPVPerp z1542

/\*Mediator variables:\*/

gen vict1=z1482

recode vict1 0=0 1/7=1 8/max=2

gen vict2=z1483

recode vict2 0=0 1/7=1 8/max=2

gen vict3=z1484

recode vict3 0=0 1/7=1 8/max=2

gen vict4=z1485

recode vict4 0=0 1/7=1 8/max=2

gen vict5=z1486

recode vict5 0=0 1/7=1 8/max=2

gen vict6=z1487

recode vict6 0=0 1/7=1 8/max=2

gen vict7=z1488

recode vict7 0=0 1/7=1 8/max=2

gen vict8=z1489

recode vict8 0=0 1/7=1 8/max=2

gen vict9=z1490

recode vict9 0=0 1/7=1 8/max=2

gen vict10=z1491

recode vict10 0=0 1/7=1 8/max=2

gen vict11=z1492

recode vict11 0=0 1/7=1 8/max=2

gen vict12=z1493

recode vict12 0=0 1/7=1 8/max=2

gen vict13=z1494

recode vict13 0=0 1/7=1 8/max=2

gen vict14=z1495

recode vict14 0=0 1/7=1 8/max=2

gen vict15=z1496

recode vict15 0=0 1/7=1 8/max=2

gen vict16=z1497

recode vict16 0=0 1/7=1 8/max=2

gen vict17=z1498

recode vict17 0=0 1/7=1 8/max=2

gen vict18=z1499

recode vict18 0=0 1/7=1 8/max=2

gen vict19=z1500

recode vict19 0=0 1/7=1 8/max=2

gen vict20=z1501

recode vict20 0=0 1/7=1 8/max=2

gen vict21=z1502

recode vict21 0=0 1/7=1 8/max=2

gen vict22=z1503

recode vict22 0=0 1/7=1 8/max=2

gen vict23=z1504

recode vict23 0=0 1/7=1 8/max=2

gen vict24=z1505

recode vict24 0=0 1/7=1 8/max=2

gen vict25=z1506

recode vict25 0=0 1/7=1 8/max=2

gen IPVvictPY = .

replace IPVvictPY = 1 if vict1==1 | vict2 ==1 | vict3==1 | vict4 ==1 | vict5==1 |vict6 ==1 | vict7==1 | vict8==1 |  
vict9 ==1 | vict10==1 | vict11==1 | vict12==1 | vict13==1 |vict14==1 | vict15==1 | vict16==1 | vict17==1 |  
vict18==1 | vict19==1 | vict20==1 | vict21==1 | vict22==1 | vict23==1 | vict24==1 | vict25==1

replace IPVvictPY = 0 if vict1==0 & vict2 ==0 & vict3==0 & vict4 ==0 & vict5==0 & vict6 ==0 & vict7==0 &  
vict8==0 & vict9 ==0 & vict10==0 & vict11==0 & vict12==0 & vict13==0 & vict14==0 & vict15==0 & vict16==0 &  
vict17==0 & vict18==0 & vict19==0 & vict20==0 & vict21==0 & vict22==0 & vict23==0 & vict24==0 & vict25==0

label variable IPVvictPY "Any past year IPV victimisation"

label define IPVvictPY 0 "No" 1 "Yes"

label values IPVvictPY IPVvictPY

tab IPVvictPY

tab IPVvictPY z1482, missing

tab IPVvictPY z1483, missing

tab IPVvictPY z1484, missing

```

tab IPVvictPY z1485, missing
tab IPVvictPY z1486, missing
tab IPVvictPY z1487, missing
tab IPVvictPY z1488, missing
tab IPVvictPY z1489, missing
tab IPVvictPY z1490, missing
tab IPVvictPY z1491, missing
tab IPVvictPY z1492, missing
tab IPVvictPY z1493, missing
tab IPVvictPY z1494, missing
tab IPVvictPY z1495, missing
tab IPVvictPY z1496, missing
tab IPVvictPY z1497, missing
tab IPVvictPY z1498, missing
tab IPVvictPY z1499, missing
tab IPVvictPY z1500, missing
tab IPVvictPY z1501, missing
tab IPVvictPY z1502, missing
tab IPVvictPY z1503, missing
tab IPVvictPY z1504, missing
tab IPVvictPY z1505, missing
tab IPVvictPY z1506, missing

```

```

gen SevPhysIPVvict= .

```

```

replace SevPhysIPVvict = 1 if vict15==1 | vict17==1 | vict18==1 | vict20==1 | vict21==1 | vict22==1 |
vict23==1 | vict24==1 | vict25==1

```

```

replace SevPhysIPVvict = 0 if vict15==0 & vict17==0 & vict18==0 & vict20==0 & vict21==0 & vict22==0 &
vict23==0 & vict24==0 & vict25==0

```

```

label variable SevPhysIPVvict "Any severe IPV victimisation in past year"

```

```

label define SevPhysIPVvict 0 "No" 1 "Yes"

```

```

label values SevPhysIPVvict SevPhysIPVvict

```

```

tab SevPhysIPVvict

```

```

tab SevPhysIPVvict vict15

```

```

tab SevPhysIPVvict vict17

```

```

tab SevPhysIPVvict vict18

```

```

tab SevPhysIPVvict vict20
tab SevPhysIPVvict vict21
tab SevPhysIPVvict vict22
tab SevPhysIPVvict vict23
tab SevPhysIPVvict vict24
tab SevPhysIPVvict vict25
label define alcud30 0 "No" 1 "Yes"
label values alcud30 alcud30
rename alcud30 AUDPY

/*Variables for adjustment + descriptive analyses:*/
gen income=ppptotfaminc30
label define gender 1 "Male" 2 "Female"
label values gender gender
rename gender sexgender
label define hieduc30 1 "None" 2 "High school qualifications" 3 "Trade/technical qualifications" 4 "Tertiary
(University/Polytech Degree) qualifications"
label values hieduc30 hieduc30

gen education=hieduc30
recode education 1=0 2=1 3/4=2
label variable education "Highest education qualification"
label define education 0 "None" 1 "High school qualifications/equivalent" 2 "Degree/equiv"
label values education education
tab hieduc30 education
tab education, gen (educationdummy)

** descriptive
tab majordepPY
tab PhysicalIPVperpPY
tab SevPhysIPVPerp
tab PhysicalIPVperpPY sexgender
tab SevPhysIPVPerp sexgender
tab PhysicalIPVperpPY majordepPY if sexgender==1
tab PhysicalIPVperpPY majordepPY if sexgender==2

```

```
tab SevPhysIPVPerp majordepPY if sexgender==1
```

```
tab SevPhysIPVPerp majordepPY if sexgender==2
```

```
*** mediation - physical IPV perp
```

```
/* men physical IPV perp - alcohol use mediation analysis*/
```

```
gen int_dep_alcohol = majordepPY*AUDPY
```

```
medeff (logit AUDPY majordepPY income z10 educationdummy1 educationdummy2) (logit PhysicalIPVperpPY  
majordepPY AUDPY int_dep_alcohol income z10 educationdummy1 educationdummy2) if sexgender==1,  
mediate (AUDPY) treat(majordepPY) sims(1000) seed(1) level(95) interact(int_dep_alcohol)
```

```
/* women - physical IPV perp - alcohol use mediation analysis*/
```

```
medeff (logit AUDPY majordepPY income z10 educationdummy1 educationdummy2) (logit PhysicalIPVperpPY  
majordepPY AUDPY income z10 educationdummy1 educationdummy2) if sexgender==2, mediate (AUDPY)  
treat(majordepPY) sims(1000) seed(1) level(95)
```

```
***
```

```
/* men - physical IPV perp - IPV victimisation mediation analysis*/
```

```
gen int_dep_ipvvict = majordepPY*IPVvictPY
```

```
*men - physical IPV perp - IPV victimisation mediation analysis
```

```
medeff (logit IPVvictPY majordepPY income z10 educationdummy1 educationdummy2) (logit  
PhysicalIPVperpPY majordepPY IPVvictPY int_dep_ipvvict income childrenbinary educationdummy1  
educationdummy2) if sexgender==1, mediate (IPVvictPY) treat(majordepPY) sims(1000) seed(1) level(95)  
interact(int_dep_ipvvict)
```

```
/* women - physical IPV perp - IPV victimisation mediation analysis*/
```

```
medeff (logit IPVvictPY majordepPY income z10 educationdummy1 educationdummy2) (logit  
PhysicalIPVperpPY majordepPY IPVvictPY int_dep_ipvvict income z10 educationdummy1 educationdummy2) if  
sexgender==2, mediate (IPVvictPY) treat(majordepPY) sims(1000) seed(1) level(95) interact(int_dep_ipvvict)
```

```
***
```

```
/* men - physical IPV perp - severe IPV victimisation mediation analysis*/
```

```
gen int_dep_sevipvvict = majordepPY*SevPhysIPVvict
```

```
medeff (logit SevPhysIPVvict majordepPY income z10 educationdummy1 educationdummy2) (logit  
PhysicalIPVperpPY majordepPY SevPhysIPVvict int_dep_sevipvvict income z10 educationdummy1  
educationdummy2) if sexgender==1, mediate (SevPhysIPVvict) treat(majordepPY) sims(1000) seed(1) level(95)  
interact(int_dep_sevipvvict)
```

```
/* women - physical IPV perp - severe IPV victimisation mediation analysis*/
```

```
medeff (logit SevPhysIPVvict majordepPY income z10 educationdummy1 educationdummy2) (logit  
PhysicalIPVperpPY majordepPY SevPhysIPVvict int_dep_sevipvvict income z10 educationdummy1  
educationdummy2) if sexgender==2, mediate (SevPhysIPVvict) treat(majordepPY) sims(1000) seed(1) level(95)  
interact(int_dep_sevipvvict)
```

```
**** severe IPV perpetration ***
```

```
/* men sev physical IPV perp - alcohol use mediation analysis*/
```

```

medeff (logit AUDPY majordepPY income z10 educationdummy1 educationdummy2) (logit SevPhysIPVPerp
majordepPY AUDPY int_dep_alcohol income z10 educationdummy1 educationdummy2) if sexgender==1,
mediate (AUDPY) treat(majordepPY) sims(1000) seed(1) level(95) interact(int_dep_alcohol)

/* women - sev physical IPV perp - alcohol use mediation analysis*/

medeff (logit AUDPY majordepPY income z10 educationdummy1 educationdummy2) (logit SevPhysIPVPerp
majordepPY AUDPY int_dep_alcohol income z10 educationdummy1 educationdummy2) if sexgender==2,
mediate (AUDPY) treat(majordepPY) sims(1000) seed(1) level(95) interact(int_dep_alcohol)

***

/* men - sev physical IPV perp - IPV victimisation - mediation analysis*/

medeff (logit IPVvictPY majordepPY income z10 educationdummy1 educationdummy2) (logit SevPhysIPVPerp
majordepPY IPVvictPY int_dep_ipvvict income z10 educationdummy1 educationdummy2) if sexgender==1,
mediate (IPVvictPY) treat(majordepPY) sims(1000) seed(1) level(95) interact(int_dep_ipvvict)

/* women - sev physical IPV perp - IPV victimisation - mediation analysis*/

medeff (logit IPVvictPY majordepPY income z10 educationdummy1 educationdummy2) (logit SevPhysIPVPerp
majordepPY IPVvictPY int_dep_ipvvict income z10 educationdummy1 educationdummy2) if sexgender==2,
mediate (IPVvictPY) treat(majordepPY) sims(1000) seed(1) level(95) interact(int_dep_ipvvict)

***

/* men - sev physical IPV perp - severe IPV victimisation - mediation analysis*/

medeff (logit SevPhysIPVvict majordepPY income z10 educationdummy1 educationdummy2) (logit
SevPhysIPVPerp majordepPY SevPhysIPVvict int_dep_sevipvvict income z10 educationdummy1
educationdummy2) if sexgender==1, mediate (SevPhysIPVvict) treat(majordepPY) sims(1000) seed(1) level(95)
interact(int_dep_sevipvvict)

/* women - sev physical IPV perp - severe IPV victimisation - mediation analysis*/

medeff (logit SevPhysIPVvict majordepPY income z10 educationdummy1 educationdummy2) (logit
SevPhysIPVPerp majordepPY SevPhysIPVvict int_dep_sevipvvict income z10 educationdummy1
educationdummy2) if sexgender==2, mediate (SevPhysIPVvict) treat(majordepPY) sims(1000) seed(1) level(95)
interact(int_dep_sevipvvict)

```

### 3. NSFH code

```

keep if ASAMPLE==1

gen relationship=MARCOHAB

recode relationship 1/6=1 7/max=.

drop if relationship==.

svyset [pweight=SAMWT]

rename M2DP01 sexgender

/*exposure*/

recode E202A 0=0 1/2=1 3/4=2 5/7=3 8/max=.

tab E202A

```

recode E202B 0=0 1/2=1 3/4=2 5/7=3 8/max=.

tab E202B

recode E202C 0=0 1/2=1 3/4=2 5/7=3 8/max=.

tab E202C

recode E202D 0=0 1/2=1 3/4=2 5/7=3 8/max=.

tab E202D

recode E202E 0=0 1/2=1 3/4=2 5/7=3 8/max=.

tab E202E

recode E202F 0=0 1/2=1 3/4=2 5/7=3 8/max=.

tab E202F

recode E202G 0=0 1/2=1 3/4=2 5/7=3 8/max=.

tab E202G

recode E202H 0=0 1/2=1 3/4=2 5/7=3 8/max=.

tab E202H

recode E202I 0=0 1/2=1 3/4=2 5/7=3 8/max=.

tab E202I

recode E202J 0=0 1/2=1 3/4=2 5/7=3 8/max=.

tab E202J

recode E202K 0=0 1/2=1 3/4=2 5/7=3 8/max=.

tab E202K

recode E202L 0=0 1/2=1 3/4=2 5/7=3 8/max=.

tab E202L

gen CESDadapt= E202A+ E202B+ E202C+ E202D+ E202E+ E202F+ E202G+ E202H+ E202I+ E202J+ E202K+ E202L

tab CESDadapt

gen CESDbinary=CESDadapt

recode CESDbinary min/11=0 12/max=1

label variable CESDbinary "Depression score of 12+ on adapted CESD"

label define CESDbinary 0 "No" 1 "Yes"

label values CESDbinary CESDbinary

tab CESDadapt CESDbinary

tab2 CESDbinary sexgender

```

/* outcome*/

gen physIPVperp1=E613

recode physIPVperp1 0=0 1/4=1 5/max=.

label variable physIPVperp1 "Had a physical fight in the past year which has resulted in the respondent hitting,
shoving, or throwing things at their partner"

label define physIPVperp1 0 "No" 1 "Yes"

label values physIPVperp1 physIPVperp1

tab physIPVperp1 E613


gen physIPVperp2=E616

recode physIPVperp2 1=1 2=0 3/max=.

label variable physIPVperp2 "Partner been cut, brusied or seriously injured in a fight with the respondent"

label define physIPVperp2 0 "No" 1 "Yes"

label values physIPVperp2 physIPVperp2

tab physIPVperp2 E616


gen physIPVperp3=E709

recode physIPVperp3 0=0 1/4=1 6/max=.

label variable physIPVperp3 "Had a physical fight in the past year which has resulted in the respondent hitting,
shoving, or throwing things at their partner"

label define physIPVperp3 0 "No" 1 "Yes"

label values physIPVperp3 physIPVperp3

tab physIPVperp3 E709


gen physIPVperp4=E712

recode physIPVperp4 1=1 2=0 3/max=.

label variable physIPVperp4 "Partner been cut, brusied or seriously injured in a fight with the respondent"

label define physIPVperp4 0 "No" 1 "Yes"

label values physIPVperp4 physIPVperp4

tab physIPVperp4 E712


gen PhysicalIPVperpPY =.

replace PhysicalIPVperpPY =0 if E708==2

replace PhysicalIPVperpPY =0 if E612==2

```

```

replace PhysicalIPVperpPY =1 if physIPVperp1==1 | physIPVperp2==1 | physIPVperp3==1 | physIPVperp4==1
label variable PhysicalIPVperpPY "Any physical or injurious IPV perpetration in the past year"
label define PhysicalIPVperpPY 0 "No" 1 "Yes"
label values PhysicalIPVperpPY PhysicalIPVperpPY
tab PhysicalIPVperpPY

```

```

/*Severe IPV perpetration*/
gen SevPhysIPVPerp=PhysicalIPVperpPY
replace SevPhysIPVPerp=3 if physIPVperp2==1 | physIPVperp4==1
recode SevPhysIPVPerp 0/1=0 3=1
label variable SevPhysIPVPerp "Any severe IPV perpetration in the past year"
label define SevPhysIPVPerp 0 "No" 1 "Yes"
label values SevPhysIPVPerp SevPhysIPVPerp
tab SevPhysIPVPerp

```

```

/* mediators*/
gen physIPVvict1=E614
recode physIPVvict1 0=0 1/4=1 6/max=.
label variable physIPVvict1 "Had a physical fight in the past year which has resulted in their partner hitting,
shoving, or throwing things at them"
label define physIPVvict1 0 "No" 1 "Yes"
label values physIPVvict1 physIPVvict1
tab physIPVvict1 E614

```

```

gen physIPVvict2=E615
recode physIPVvict2 1=1 2=0 3/max=.
label variable physIPVvict2 "Been cut, bruised or seriously injured in a fight with your partner"
label define physIPVvict2 0 "No" 1 "Yes"
label values physIPVvict2 physIPVvict2
tab physIPVvict2 E615

```

```

gen physIPVvict3=E710
recode physIPVvict3 0=0 1/4=1 6/max=.

```

```
label variable physIPVvict3 "Had a physical fight in the past year which has resulted in their partner hitting, shoving, or throwing things at them"
```

```
label define physIPVvict3 0 "No" 1 "Yes"
```

```
label values physIPVvict3 physIPVvict3
```

```
tab physIPVvict3 E710
```

```
gen physIPVvict4=E711
```

```
recode physIPVvict4 1=1 2=0 3/max=.
```

```
label variable physIPVvict4 "Been cut, bruised or seriously injured in a fight with your partner"
```

```
label define physIPVvict4 0 "No" 1 "Yes"
```

```
label values physIPVvict4 physIPVvict4
```

```
tab physIPVvict4 E711
```

```
gen IPVvictPY1=.
```

```
replace IPVvictPY1=0 if E708==2
```

```
replace IPVvictPY1=0 if E612==2
```

```
replace IPVvictPY1=1 if physIPVvict1==1 | physIPVvict2==1 | physIPVvict3==1 | physIPVvict4==1
```

```
label variable IPVvictPY1 "Any physical or injurious IPV victimisation in the past year"
```

```
label define IPVvictPY1 0 "No" 1 "Yes"
```

```
label values IPVvictPY1 IPVvictPY1
```

```
tab IPVvictPY1
```

```
tab IPVvictPY1 physIPVvict1
```

```
tab IPVvictPY1 physIPVvict2
```

```
tab IPVvictPY1 physIPVvict3
```

```
tab IPVvictPY1 physIPVvict4
```

```
/* Severe IPV victimisation*/
```

```
gen SevPhysIPVvict=IPVvictPY
```

```
replace SevPhysIPVvict=3 if physIPVvict2==1 | physIPVvict4==1
```

```
recode SevPhysIPVvict 0/1=0 3=1
```

```
label variable SevPhysIPVvict "Any severe IPV victimisation in the past year"
```

```
label define SevPhysIPVvict 0 "No" 1 "Yes"
```

```
label values SevPhysIPVvict SevPhysIPVvict
```

```

tab SevPhysIPVvict

gen alcoholprob=E209A
recode alcoholprob 1=1 2/7=0 8/max=.
label variable alcoholprob "Respondent has a problem with drinking too much alcohol"
label define alcoholprob 0 "No" 1 "Yes"
label values alcoholprob alcoholprob
tab alcoholprob E209A
recode LSTA1NUM 6=.
gen Noofchildren= LSTA1NUM+LSTA2NUM
tab Noofchildren
gen age=M2BP01
gen income=IHTOT2
recode income 99999999=. 99999996=. 99999997=. 99999998=.
gen education=COMPLED
recode education 0/9=0 10/13=1 14/20=2 99=.
label variable education "Highest education qualification"
label define education 0 "None" 1 "High school qualifications" 2 "University degree or equivalent (and higher)"
label values education education
tab COMPLED education
tab education, gen (educationdummy)

** descriptives
summarize M2BP01, detail
tab CESDbinary
tab PhysicalIPVperpPY
tab SevPhysIPVPerp

svy: proportion PhysicalIPVperpPY
svy: proportion SevPhysIPVPerp
svy: proportion CESDbinary
svy: proportion PhysicalIPVperpPY if sexgender==1
svy: proportion PhysicalIPVperpPY if sexgender==2
svy: proportion SevPhysIPVPerp if sexgender==1

```

```
svy: proportion SevPhysIPVPerp if sexgender==2
```

```
svy: proportion PhysicalIPVperpPY if sexgender==1 & CESDbinary==0
```

```
svy: proportion PhysicalIPVperpPY if sexgender==1 & CESDbinary==1
```

```
svy: proportion PhysicalIPVperpPY if sexgender==2 & CESDbinary==0
```

```
svy: proportion PhysicalIPVperpPY if sexgender==2 & CESDbinary==1
```

```
svy: proportion SevPhysIPVPerp if sexgender==1 & CESDbinary==0
```

```
svy: proportion SevPhysIPVPerp if sexgender==1 & CESDbinary==1
```

```
svy: proportion SevPhysIPVPerp if sexgender==2 & CESDbinary==0
```

```
svy: proportion SevPhysIPVPerp if sexgender==2 & CESDbinary==1
```

```
*** mediation analysis - example
```

```
/*gen int_dep_subst = DepressionPY*SubMisuse
```

```
medeff (logit SubMisuse DepressionPY agedummy1 agedummy2) (logit PhysicalIPVperpPY DepressionPY  
SubMisuse int_dep_subst agedummy1 agedummy2), mediate (SubMisuse) treat(DepressionPY) sims(1000)  
seed(1) level(95) interact(int_dep_subst)*/
```

```
/* men physical IPV perp - alcohol use mediation analysis*/
```

```
gen int_dep_alc = CESDbinary*alcoholprob
```

```
medeff (logit alcoholprob CESDbinary income age educationdummy1 educationdummy2 Noofchildren) (logit  
PhysicalIPVperpPY CESDbinary alcoholprob int_dep_alc income age educationdummy1 educationdummy2  
Noofchildren) if sexgender==1 [pweight=SAMWT], mediate (alcoholprob) treat(CESDbinary) sims(1000)  
seed(1) level(95) interact(int_dep_alc)
```

```
/* women - physical IPV perp - alcohol use mediation analysis*/
```

```
medeff (logit alcoholprob CESDbinary income age educationdummy1 educationdummy2 Noofchildren) (logit  
PhysicalIPVperpPY CESDbinary alcoholprob int_dep_alc income age educationdummy1 educationdummy2  
Noofchildren) if sexgender==2 [pweight=SAMWT], mediate (alcoholprob) treat(CESDbinary) sims(1000)  
seed(1) level(95) interact(int_dep_alc)
```

```
***
```

```
/* men - physical IPV perp - IPV victimisation mediation analysis*/
```

```
gen int_dep_ipvvict = CESDbinary*IPVvictPY1
```

```
medeff (logit IPVvictPY1 CESDbinary income age educationdummy1 educationdummy2 Noofchildren) (logit  
PhysicalIPVperpPY CESDbinary IPVvictPY1 int_dep_ipvvict income age educationdummy1 educationdummy2  
Noofchildren) if sexgender==1 [pweight=SAMWT], mediate (IPVvictPY1) treat(CESDbinary) sims(1000) seed(1)  
level(95) interact(int_dep_ipvvict)
```

```
/* women - physical IPV perp - IPV victimisation mediation analysis*/
```

```
medeff (logit IPVvictPY1 CESDbinary income age educationdummy1 educationdummy2 Noofchildren) (logit  
PhysicalIPVperpPY CESDbinary IPVvictPY1 int_dep_ipvvict income age educationdummy1 educationdummy2  
Noofchildren) if sexgender==2 [pweight=SAMWT], mediate (IPVvictPY1) treat(CESDbinary) sims(1000) seed(1)  
level(95) interact(int_dep_ipvvict)
```

```
***
```

```

/* men - physical IPV perp - severe IPV victimisation mediation analysis*/

gen int_dep_sevipvvict = CESDbinary*SevPhysIPVvict

medeff (logit SevPhysIPVvict CESDbinary income age educationdummy1 educationdummy2 Noofchildren)
(logit PhysicalIPVperpPY CESDbinary SevPhysIPVvict int_dep_sevipvvict income age educationdummy1
educationdummy2 Noofchildren) if sexgender==1 [pweight=SAMWT], mediate (SevPhysIPVvict)
treat(CESDbinary) sims(1000) seed(1) level(95) interact(int_dep_sevipvvict)

/* women - physical IPV perp - severe IPV victimisation mediation analysis*/

medeff (logit SevPhysIPVvict CESDbinary income age educationdummy1 educationdummy2 Noofchildren)
(logit PhysicalIPVperpPY CESDbinary SevPhysIPVvict int_dep_sevipvvict income age educationdummy1
educationdummy2 Noofchildren) if sexgender==2 [pweight=SAMWT], mediate (SevPhysIPVvict)
treat(CESDbinary) sims(1000) seed(1) level(95) interact(int_dep_sevipvvict)

**** severe IPV perpetration

/* men sev physical IPV perp - alcohol use mediation analysis*/

*removed interaction term

medeff (logit alcoholprob CESDbinary income age educationdummy1 educationdummy2 Noofchildren) (logit
SevPhysIPVPerp CESDbinary alcoholprob income age educationdummy1 educationdummy2 Noofchildren) if
sexgender==1 [pweight=SAMWT], mediate (alcoholprob) treat(CESDbinary) sims(1000) seed(1) level(95)

/* women - sev physical IPV perp - alcohol use mediation analysis*/

medeff (logit alcoholprob CESDbinary income age educationdummy1 educationdummy2 Noofchildren) (logit
SevPhysIPVPerp CESDbinary alcoholprob int_dep_alc income age educationdummy1 educationdummy2
Noofchildren) if sexgender==2 [pweight=SAMWT], mediate (alcoholprob) treat(CESDbinary) sims(1000)
seed(1) level(95) interact(int_dep_alc)

***

/* men - sev physical IPV perp - IPV victimisation - mediation analysis*/

medeff (logit IPVvictPY1 CESDbinary income age educationdummy1 educationdummy2 Noofchildren) (logit
SevPhysIPVPerp CESDbinary IPVvictPY1 int_dep_ipvvict income age educationdummy1 educationdummy2
Noofchildren) if sexgender==1 [pweight=SAMWT], mediate(IPVvictPY1) treat(CESDbinary) sims(1000) seed(1)
level(95) interact (int_dep_ipvvict)

/* women - sev physical IPV perp - IPV victimisation - mediation analysis*/

medeff (logit IPVvictPY1 CESDbinary income age educationdummy1 educationdummy2 Noofchildren) (logit
SevPhysIPVPerp CESDbinary IPVvictPY1 int_dep_ipvvict income age educationdummy1 educationdummy2
Noofchildren) if sexgender==2 [pweight=SAMWT], mediate(IPVvictPY1) treat(CESDbinary) sims(1000) seed(1)
level(95) interact (int_dep_ipvvict)

***

/* men - sev physical IPV perp - severe IPV victimisation - mediation analysis*/

medeff (logit SevPhysIPVvict CESDbinary income age educationdummy1 educationdummy2 Noofchildren)
(logit SevPhysIPVPerp CESDbinary SevPhysIPVvict int_dep_sevipvvict income age educationdummy1
educationdummy2 Noofchildren) if sexgender==1 [pweight=SAMWT], mediate (SevPhysIPVvict)
treat(CESDbinary) sims(1000) seed(1) level(95) interact(int_dep_sevipvvict)

/* women - sev physical IPV perp - severe IPV victimisation - mediation analysis*/

medeff (logit SevPhysIPVvict CESDbinary income age educationdummy1 educationdummy2 Noofchildren)
(logit SevPhysIPVPerp CESDbinary SevPhysIPVvict int_dep_sevipvvict income age educationdummy1

```

```
educationdummy2 Noofchildren) if sexgender==2 [pweight=SAMWT], mediate (SevPhysIPVvict)
treat(CESDbinary) sims(1000) seed(1) level(95) interact(int_dep_sevipvvict)
```

#### 4. Add Health code

```
/* Exposure variables*/
svyset [pweight=GSWGT4_2]

/* CESD*/
gen H4MH24reverse = H4MH24
recode H4MH24reverse 0=3 1=2 2=1 3=0 4/=max=.
label define H4MH24reverse 3 "Never or rarely" 2 "Sometimes" 1 "A lot of the time" 0 "Most of the time or all
of the time" 4 "Dont know, refused"
label values H4MH24reverse H4MH24reverse
tab H4MH24reverse H4MH24

gen H4MH25reverse = H4MH25
recode H4MH25reverse 0=3 1=2 2=1 3=0 4/=max=.
label define H4MH25reverse 3 "Never or rarely" 2 "Sometimes" 1 "A lot of the time" 0 "Most of the time or all
of the time" 4 "Dont know, refused"
label values H4MH25reverse H4MH25reverse
tab H4MH25reverse H4MH25

gen H4MH20reverse = H4MH20
recode H4MH20reverse 0=3 1=2 2=1 3=0 4/=max=.
label define H4MH20reverse 3 "Never or rarely" 2 "Sometimes" 1 "A lot of the time" 0 "Most of the time or all
of the time" 4 "Dont know, refused"
label values H4MH20reverse H4MH20reverse
tab H4MH20reverse H4MH20

tab H4MH20reverse
tab H4MH25reverse
tab H4MH24reverse
tab H4MH18
tab H4MH19
tab H4MH21
```

tab H4MH22  
tab H4MH23  
tab H4MH26  
tab H4MH27

list AID if H4MH20reverse > 3  
list AID if H4MH25reverse > 3  
list AID if H4MH24reverse > 3  
list AID if H4MH18 > 3  
list AID if H4MH19 > 3  
list AID if H4MH21 > 3  
list AID if H4MH22 > 3  
list AID if H4MH23 > 3  
list AID if H4MH26 > 3  
list AID if H4MH27 > 3

recode H4MH18 4/max=.  
recode H4MH19 4/max=.  
recode H4MH21 4/max=.  
recode H4MH22 4/max=.  
recode H4MH23 4/max=.  
recode H4MH26 4/max=.  
recode H4MH27 4/max=.

gen CESD = H4MH20reverse + H4MH25reverse + H4MH24reverse + H4MH18 + H4MH19 + H4MH21 + H4MH22  
+ H4MH23 + H4MH26 + H4MH27

replace CESD = 4 in 474  
replace CESD = 7 in 771  
replace CESD = 8 in 1668  
replace CESD = 5 in 2154  
replace CESD = 12 in 2947  
replace CESD = 3 in 2993  
replace CESD = 6 in 3332  
replace CESD = 11 in 3639

```

gen CESDbinary = CESD
recode CESDbinary min/7=0 8/max=1
label variable CESDbinary "Positive screen on CES-D 10 scale (binary)"
label define CESDbinary 0 "No" 1 "Yes"
label values CESDbinary CESDbinary
tab CESDbinary CESD

/* Outcome variables */

/*Physical IPV perp*/
gen PhylPVperpPY1 = H4RD22
recode PhylPVperpPY1 0/1=0 2/7=1 8/max=.
label variable PhylPVperpPY1 "Perpetration of pushing, shoving, throwing in PY"
label define PhylPVperpPY1 0 "No" 1 "Yes" 2 "Dont know, refused"
label values PhylPVperpPY1 PhylPVperpPY1
tab PhylPVperpPY1 H4RD22

gen PhylPVperpPY2 = H4RD23
recode PhylPVperpPY2 0/1=0 2/7=1 8/max=.
label variable PhylPVperpPY2 "Perpetration of slapping, hitting, kicking in PY"
label define PhylPVperpPY2 0 "No" 1 "Yes" 2 "Dont know, refused"
label values PhylPVperpPY2 PhylPVperpPY2
tab PhylPVperpPY2 H4RD23

gen PhysicalIPVperpPY=.
replace PhysicalIPVperpPY = 1 if PhylPVperpPY2 == 1
replace PhysicalIPVperpPY = 1 if PhylPVperpPY1 == 1
replace PhysicalIPVperpPY = 0 if PhylPVperpPY2 == 0 & PhylPVperpPY1 == 0
label variable PhysicalIPVperpPY "Perpetration of physical IPV perpetration in PY"
label define PhysicalIPVperpPY 0 "No" 1 "Yes"
label values PhysicalIPVperpPY PhysicalIPVperpPY
tab PhysicalIPVperpPY

```

```

tab PhysicalIPVperpPY PhyIPVperpPY2
tab PhysicalIPVperpPY PhyIPVperpPY1

gen SevPhysIPVPerp = PhysicalIPVperpPY
replace SevPhysIPVPerp = 3 if PhyIPVperpPY2==1
tab SevPhysIPVPerp
recode SevPhysIPVPerp 0/1=0 3=1
label variable SevPhysIPVPerp "Perpetration of severe physical IPV in the past year"
label define SevPhysIPVPerp 0 "No" 1 "Yes" 2 "Dont know, refused"
label values SevPhysIPVPerp SevPhysIPVPerp
tab SevPhysIPVPerp

/* Mediator variables*/
/*IPV vict PY*/
gen IPVvict4 = H4RD18
recode IPVvict4 0/1=0 2/7=1 8/max=.
label variable IPVvict4 "IPV victimisation (pushing, shoving, throwing)"
label define IPVvict4 0 "No" 1 "Yes" 2 "Dont know, refused"
label values IPVvict4 IPVvict4
tab IPVvict4 H4RD18

gen IPVvict5 = H4RD19
recode IPVvict5 0/1=0 2/7=1 8/max=.
label variable IPVvict5 "IPV victimisation (slapping, kicking, hitting)"
label define IPVvict5 0 "No" 1 "Yes" 2 "Dont know, refused"
label values IPVvict5 IPVvict5
tab IPVvict5 H4RD19

gen IPVvict6 = H4RD21
recode IPVvict6 0/1=0 2/7=1 8/max=.
label variable IPVvict6 "IPV victimisation (sexual)"
label define IPVvict6 0 "No" 1 "Yes" 2 "Dont know, refused"
label values IPVvict6 IPVvict6
tab IPVvict6 H4RD21

```

```

gen IPVvictPY = .
replace IPVvictPY = 1 if IPVvict4 == 1 | IPVvict5 == 1 | IPVvict6 == 1
replace IPVvictPY = 0 if IPVvict4 == 0 & IPVvict5 == 0 & IPVvict6 == 0
label variable IPVvictPY "Past year IPV victimisation"
label define IPVvictPY 0 "No" 1 "Yes"
label values IPVvictPY IPVvictPY
tab IPVvictPY

/*Severe physical IPV victimisation*/
gen sevIPVvict1 = H4RD19
recode sevIPVvict1 0/1=0 2/7=1 96=. 98=.
label variable sevIPVvict1 "IPV victimisation (slapping, kicking, hitting)"
label define sevIPVvict1 0 "No" 1 "Yes" 2 "Dont know, refused"
label values sevIPVvict1 sevIPVvict1
tab sevIPVvict1 H4RD19

gen sevIPVvict2= H4RD20
recode sevIPVvict2 0/1=0 2/7=1 97=0 98=. 96=.
label variable sevIPVvict2 "IPv victimisation - had an injury e.g. a cut, sprain or bruise, in the past year"
label define sevIPVvict2 0 "No" 1 "Yes" 2 "Dont know, refused"
label values sevIPVvict2 sevIPVvict2
tab sevIPVvict2 H4RD20

gen SevPhysIPVvict = .
replace SevPhysIPVvict= 0 if sevIPVvict1 == 0 & sevIPVvict2 == 0
replace SevPhysIPVvict= 1 if sevIPVvict1 == 1 | sevIPVvict2 == 1
label variable SevPhysIPVvict "Severe IPV victimisation in the past year"
label define SevPhysIPVvict 0 "No" 1 "Yes"
label values SevPhysIPVvict SevPhysIPVvict
tab SevPhysIPVvict
tab SevPhysIPVvict H4RD19
tab SevPhysIPVvict H4RD20

```

```

/* alcohol*/
tab H4TO40 H4TO39
gen bingedrink1 = H4TO39
recode bingedrink1 0/3=0 97=0 4/6=1 96=2 98=2
label variable bingedrink1 "Number of days on which the participant has had a drink in the past month"
label define bingedrink1 0 "Fewer than 2 days a week" 1 "2 or more days a week" 2 "Don't know/refused"
label values bingedrink1 bingedrink1
tab bingedrink1 H4TO39

gen bingedrink2 = H4TO40
recode bingedrink2 min/3=0 4/18=1 95=2 96=2 97=0 98=2
label variable bingedrink2 "Number of drinks usually consumed on a day of drinking in the last 30 days"
label define bingedrink2 0 "Fewer than 3 drinks" 1 "4 or more drinks" 2 "Don't know/refused/not asked"
label values bingedrink2 bingedrink2
tab bingedrink2 H4TO40

gen BingeDrink=.
replace BingeDrink = 1 if bingedrink1==1 & bingedrink2==1
replace BingeDrink = 0 if bingedrink1==0 & bingedrink2==0
replace BingeDrink = 0 if bingedrink1==1 & bingedrink2==0
replace BingeDrink = 0 if bingedrink1==0 & bingedrink2==1
label variable BingeDrink "Binge drinking, defined as 4 or more drinks on more than 2 days per week in the last month"
label define BingeDrink 1 "Yes" 0 "No"
label values BingeDrink BingeDrink
tab BingeDrink

/* Variables for adjustment + descriptive analyses*/
gen age1=IYEAR4-H4OD1Y
tab age1
gen agegroup=age1
rename BIO_SEX4 sexgender
gen children=H4TR11
replace children= . if H4TR9 == 96
replace children= . if H4TR9 == 98
gen education=H4ED2

```

```

recode education 1/2=0 3/4=1 5=2 6=1 7/13=2 98=.
label variable education "Highest education qualification"
label define education 0 "No qualifications" 1 "High school / equivalent" 2 "Degree/equiv"
label values education education
tab H4ED2 education
tab education, gen(educationdummy)
gen income=H4EC1
recode income 1=2500 2=7499.5 3=12499.5 4=17499.5 5=22499.5 6=27499.5 7=34999.5 8=44999.5
9=62499.5 10=87499.5 11=124999.5 12=174999.5 96=. 98=.
label variable income "Approximate income based on mid point of bands"

** descriptives
summarize age1, detail
tab CESDbinary
tab PhysicalIPVperpPY
tab SevPhysIPVPerp
svy: proportion SevPhysIPVPerp
svy: proportion CESDbinary
svy: proportion PhysicalIPVperpPY
svy: proportion PhysicalIPVperpPY if sexgender==1
svy: proportion PhysicalIPVperpPY if sexgender==2
svy: proportion SevPhysIPVPerp if sexgender==1
svy: proportion SevPhysIPVPerp if sexgender==2
svy: proportion PhysicalIPVperpPY if sexgender==1 & CESDbinary==0
svy: proportion PhysicalIPVperpPY if sexgender==1 & CESDbinary==1
svy: proportion PhysicalIPVperpPY if sexgender==2 & CESDbinary==0
svy: proportion PhysicalIPVperpPY if sexgender==2 & CESDbinary==1
svy: proportion SevPhysIPVPerp if sexgender==1 & CESDbinary==0
svy: proportion SevPhysIPVPerp if sexgender==1 & CESDbinary==1
svy: proportion SevPhysIPVPerp if sexgender==2 & CESDbinary==0
svy: proportion SevPhysIPVPerp if sexgender==2 & CESDbinary==1
/* men physical IPV perp - alcohol use mediation analysis*/
gen int_dep_alc = CESDbinary*BingeDrink
medeff (logit BingeDrink CESDbinary age1 income educationdummy1 educationdummy2 children) (logit
PhysicalIPVperpPY CESDbinary BingeDrink int_dep_alc age1 income educationdummy1 educationdummy2

```

```
children) if sexgender==1 [pweight=GSWGT4_2], mediate (BingeDrink) treat(CESDbinary) sims(1000) seed(1)
level(95) interact(int_dep_alc)
```

```
/* women - physical IPV perp - alcohol use mediation analysis*/
```

```
medeff (logit BingeDrink CESDbinary age1 income educationdummy1 educationdummy2 children) (logit
PhysicalIPVperpPY CESDbinary BingeDrink int_dep_alc age1 income educationdummy1 educationdummy2
children) if sexgender==2 [pweight=GSWGT4_2], mediate (BingeDrink) treat(CESDbinary) sims(1000) seed(1)
level(95) interact(int_dep_alc)
```

```
***
```

```
/* men - physical IPV perp - IPV victimisation mediation analysis*/
```

```
gen int_dep_ipvvict = CESDbinary*IPVvictPY
```

```
medeff (logit IPVvictPY CESDbinary age1 income educationdummy1 educationdummy2 children) (logit
PhysicalIPVperpPY CESDbinary IPVvictPY int_dep_ipvvict age1 income educationdummy1 educationdummy2
children) if sexgender==1 [pweight=GSWGT4_2], mediate (IPVvictPY) treat(CESDbinary) sims(1000) seed(1)
level(95) interact(int_dep_ipvvict)
```

```
/* women - physical IPV perp - IPV victimisation mediation analysis*/
```

```
medeff (logit IPVvictPY CESDbinary age1 income educationdummy1 educationdummy2 children) (logit
PhysicalIPVperpPY CESDbinary IPVvictPY int_dep_ipvvict age1 income educationdummy1 educationdummy2
children) if sexgender==2 [pweight=GSWGT4_2], mediate (IPVvictPY) treat(CESDbinary) sims(1000) seed(1)
level(95) interact(int_dep_ipvvict)
```

```
***
```

```
/* men - physical IPV perp - severe IPV victimisation mediation analysis*/
```

```
gen int_dep_sevipvict = CESDbinary*SevPhysIPVvict
```

```
medeff (logit SevPhysIPVvict CESDbinary age1 income educationdummy1 educationdummy2 children) (logit
PhysicalIPVperpPY CESDbinary SevPhysIPVvict int_dep_sevipvict age1 income educationdummy1
educationdummy2 children) if sexgender==1 [pweight=GSWGT4_2], mediate (SevPhysIPVvict)
treat(CESDbinary) sims(1000) seed(1) level(95) interact(int_dep_sevipvict)
```

```
/* women - physical IPV perp - severe IPV victimisation mediation analysis*/
```

```
medeff (logit SevPhysIPVvict CESDbinary age1 income educationdummy1 educationdummy2 children) (logit
PhysicalIPVperpPY CESDbinary SevPhysIPVvict int_dep_sevipvict age1 income educationdummy1
educationdummy2 children) if sexgender==2 [pweight=GSWGT4_2], mediate (SevPhysIPVvict)
treat(CESDbinary) sims(1000) seed(1) level(95) interact(int_dep_sevipvict)
```

```
**** severe IPV perpetration
```

```
/* men sev physical IPV perp - alcohol use mediation analysis*/
```

```
medeff (logit BingeDrink CESDbinary age1 income educationdummy1 educationdummy2 children) (logit
SevPhysIPVPerp CESDbinary BingeDrink int_dep_alc age1 income educationdummy1 educationdummy2
children) if sexgender==1 [pweight=GSWGT4_2], mediate (BingeDrink) treat(CESDbinary) sims(1000) seed(1)
level(95) interact(int_dep_alc)
```

```
/* women - sev physical IPV perp - alcohol use mediation analysis*/
```

```
medeff (logit BingeDrink CESDbinary age1 income educationdummy1 educationdummy2 children) (logit
SevPhysIPVPerp CESDbinary BingeDrink int_dep_alc age1 income educationdummy1 educationdummy2
children) if sexgender==2 [pweight=GSWGT4_2], mediate (BingeDrink) treat(CESDbinary) sims(1000) seed(1)
level(95) interact(int_dep_alc)
```

\*\*\*

/\* men - sev physical IPV perp - IPV victimisation - mediation analysis\*/

\*removed interactionterm

```
medeff (logit IPVvictPY CESDbinary age1 income educationdummy1 educationdummy2 children) (logit
SevPhysIPVPerp CESDbinary IPVvictPY age1 income educationdummy1 educationdummy2 children) if
sexgender==1 [pweight=GSWGT4_2], mediate (IPVvictPY) treat(CESDbinary) sims(1000) seed(1) level(95)
```

/\* women - sev physical IPV perp - IPV victimisation - mediation analysis\*/

```
medeff (logit IPVvictPY CESDbinary age1 income educationdummy1 educationdummy2 children) (logit
SevPhysIPVPerp CESDbinary IPVvictPY int_dep_ipvvict age1 income educationdummy1 educationdummy2
children) if sexgender==2 [pweight=GSWGT4_2], mediate (IPVvictPY) treat(CESDbinary) sims(1000) seed(1)
level(95) interact(int_dep_ipvvict)
```

\*\*\*

/\* men - sev physical IPV perp - severe IPV victimisation - mediation analysis\*/

```
medeff (logit SevPhysIPVvict CESDbinary age1 income educationdummy1 educationdummy2 children) (logit
SevPhysIPVPerp CESDbinary SevPhysIPVvict int_dep_sevipvvict age1 income educationdummy1
educationdummy2 children) if sexgender==1 [pweight=GSWGT4_2], mediate (SevPhysIPVvict)
treat(CESDbinary) sims(1000) seed(1) level(95) interact(int_dep_sevipvvict)
```

/\* women - sev physical IPV perp - severe IPV victimisation - mediation analysis\*/

```
medeff (logit SevPhysIPVvict CESDbinary age1 income educationdummy1 educationdummy2 children) (logit
SevPhysIPVPerp CESDbinary SevPhysIPVvict int_dep_sevipvvict age1 income educationdummy1
educationdummy2 children) if sexgender==2 [pweight=GSWGT4_2], mediate (SevPhysIPVvict)
treat(CESDbinary) sims(1000) seed(1) level(95) interact(int_dep_sevipvvict)
```

## 5. 2014 APMS code

\*VARIABLE GENERATION

\*ResSex 1=male 2=female

svyset ipsu [pweight=weight\_core], strata(istrata)

\*drop participants who report never being in a relationship

keep if NevRel==1

\*generating any depression variable

gen anydep=.

replace anydep =1 if milddep==1 | moddep==1 | sevdep==1

replace anydep=0 if milddep==0 & moddep==0 & sevdep==0

label variable anydep "any depression diagnosis"

label define anydep 0 "no" 1 "yes"

label values anydep anydep

tab anydep milddep

tab anydep moddep

tab anydep sevdep

\*generating past year physical IPV perpetration variable

gen PhysicalIPVperpPY=.

replace PhysicalIPVperpPY = 1 if Act2Whn== 1 | Act3Whn==1

replace PhysicalIPVperpPY = 0 if Act2Whn== 2 & Act3Whn==2

replace PhysicalIPVperpPY = 0 if Act2Whn== -1 & Act3Whn== -1

label variable PhysicalIPVperpPY "Physical IPV perpetration in the past year"

label define PhysicalIPVperpPY 0 "No" 1 "Yes"

label values PhysicalIPVperpPY

tab PhysicalIPVperpPY

tab PhysicalIPVperpPY Act2Whn

tab PhysicalIPVperpPY Act3Whn

\*generating severe past year physical IPV perpetration variable

gen SevPhysIPVPerp=.

replace SevPhysIPVPerp = 1 if Act3Whn==1

replace SevPhysIPVPerp = 0 if Act3Whn==2

replace SevPhysIPVPerp = 0 if Act3Whn== -1

label variable SevPhysIPVPerp "Severe physical IPV perpetration in the past year"

label define SevPhysIPVPerp 0 "No" 1 "Yes"

label values SevPhysIPVPerp SevPhysIPVPerp

tab SevPhysIPVPerp

tab SevPhysIPVPerp Act3Whn

\*generating past year psychological IPV perpetration

gen PsychIPVperp=Act1Whn

recode PsychIPVperp 1=1 2=0 -1=0 8=0

label variable PsychIPVperp "Psychological perpetration in the past year"

label define PsychIPVperp 0 "No" 1 "Yes"

label values PsychIPVperp PsychIPVperp

tab PsychIPVperp Act1Whn

\*generating past year sexual IPV perpetration

gen SexualIPVperpPY=.

replace SexualIPVperpPY = 1 if Act4Whn==1

```

replace SexualIPVperpPY = 0 if Act4Whn==2
replace SexualIPVperpPY = 0 if Act4Whn==1
label variable SexualIPVperpPY "Sexual IPV perpetration in the past year"
label define SexualIPVperpPY 0 "No" 1 "Yes"
label values SexualIPVperpPY SexualIPVperpPY
tab SexualIPVperpPY Act4Whn

```

\*ANALYSIS

\*number and proportion of participants with depression

```

tab anydep
svy: proportion anydep

```

\* number and proportion of participants reporting past year physical IPV perpetration

```

tab PhysicalIPVperpPY
svy: proportion PhysicalIPVperpPY

```

\*sex disaggregated

```

tab PhysicalIPVperpPY if ResSex==1
tab PhysicalIPVperpPY if ResSex==2
svy: proportion PhysicalIPVperpPY if ResSex==1
svy: proportion PhysicalIPVperpPY if ResSex==2

```

\*with/without depression

```

tab PhysicalIPVperpPY if ResSex==1 & anydep==1
tab PhysicalIPVperpPY if ResSex==1 & anydep==0
tab PhysicalIPVperpPY if ResSex==2 & anydep==1
tab PhysicalIPVperpPY if ResSex==2 & anydep==0

```

```

svy: proportion PhysicalIPVperpPY if ResSex==1 & anydep==1
svy: proportion PhysicalIPVperpPY if ResSex==1 & anydep==0
svy: proportion PhysicalIPVperpPY if ResSex==2 & anydep==1
svy: proportion PhysicalIPVperpPY if ResSex==2 & anydep==0

```

\*number and proportion of participants reporting severe past year physical IPV perpetration

tab SevPhysIPVPerp

svy: proportion SevPhysIPVPerp

\*sex disaggregated

tab SevPhysIPVPerp if ResSex==1

tab SevPhysIPVPerp if ResSex==2

svy: proportion SevPhysIPVPerp if ResSex==1

svy: proportion SevPhysIPVPerp if ResSex==2

\*with/without depression

tab SevPhysIPVPerp if ResSex==1 & anydep==1

tab SevPhysIPVPerp if ResSex==1 & anydep==0

tab SevPhysIPVPerp if ResSex==2 & anydep==1

tab SevPhysIPVPerp if ResSex==2 & anydep==0

svy: proportion SevPhysIPVPerp if ResSex==1 & anydep==1

svy: proportion SevPhysIPVPerp if ResSex==1 & anydep==0

svy: proportion SevPhysIPVPerp if ResSex==2 & anydep==1

svy: proportion SevPhysIPVPerp if ResSex==2 & anydep==0

## **META-ANALYSIS CODE**

### **Total effect:**

metan Totaleffect LowerCI UpperCI, fixed label(namevar=Dataset) texts (150)

### **Direct effect:**

metan Averagedirecteffect LowerCI UpperCI, fixed label(namevar=Dataset) texts (150)

### **Indirect effect:**

metan Averagemediation LowerCI UpperCI, fixed label(namevar=Dataset) texts (150)
